# Supplementary material
Source: PubMed Central journal article supplement (PMC2850428)
Supplement: mmc1.pdf [file mmc1.pdf]

## A Follow-Up Study of a Genome-wide Association Scan Identifies a Susceptibility Locus for Venous Thrombosis on Chromosome 6p24.1

Pierre-Emmanuel Morange, Irene Bezemer, Noémie Saut, Lance Bare, Gwenaëlle Burgos, Jessy Brocheton, Hervé Durand, Christine Biron-Andreani, Jean-Francois Schved, Gilles Pernod, Pilar Galan, Ludovic Drouet, Diana Zelenika, Marine Germain, Viviane Nicaud, Simon Heath, Ewa Ninio, Aurélien Delluc, Thomas Münzel, Tanja Zeller, Stefan-Martin Brand-Herrmann, Marie-Christine Alessi, Laurence Tiret, Mark Lathrop, François Cambien, Stefan Blankenberg, Joseph Emmerich, David-Alexandre Trégouët, and Frits R Rosendaal

**Table S1. Genotype Distribution of rs169713 According to Age of VT Status in Four Independent Case-Control Status**

| rs169713                | GWAS                      |           | MARTHA                    |           | FARIVE                |           | MEGA                  |            |
|-------------------------|---------------------------|-----------|---------------------------|-----------|-----------------------|-----------|-----------------------|------------|
|                         | Controls                  | Cases     | Controls                  | Cases     | Controls              | Cases     | Controls              | Cases      |
| TT                      | 757 (62%)                 | 215 (51%) | 472 (59%)                 | 575 (51%) | 353 (62%)             | 332 (59%) | 2897 (64%)            | 2299 (61%) |
| TC                      | 427 (35%)                 | 170 (41%) | 297 (37%)                 | 466 (41%) | 186 (33%)             | 189 (34%) | 1414 (31%)            | 1270 (34%) |
| CC                      | 44 (3%)                   | 34 (9%)   | 32 (4%)                   | 88 (8%)   | 25 (5%)               | 40 (7%)   | 208 (5%)              | 184 (5%)   |
| MAF                     | 0.210                     | 0.284     | 0.225                     | 0.284     | 0.209                 | 0.240     | 0.202                 | 0.218      |
| P*                      | $p = 7.24 \times 10^{-6}$ |           | $p = 2.49 \times 10^{-5}$ |           | $p = 0.089$           |           | $p = 0.014$           |            |
| OR [95%CI] <sup>+</sup> | 1.495 [1.250 – 1.788]     |           | 1.370 [1.181 – 1.589]     |           | 1.192 [0.977 – 1.454] |           | 1.099 [1.020 – 1.180] |            |

\* Cochran-Armitage trend test's p-value

+ Allelic Odds Ratio with its 95% confidence interval

In the GWAS analysis, individuals were typed with the Illumina Sentrix HumanHap300 Beadchip. In all replication studies (MARTHA, FARIVE and MEGA), genotyping was performed using TaqMan technology (Applied Biosystems). Genotyping success rate for the rs169713 was 98.9%, 93.1%, 99.9%, in the MARTHA, FARIVE, MEGA, respectively

**Table S2. Risk Factors Prevalence in VT Cases**

|                   | GWAS | MARTHA | FARIVE | MEGA |
|-------------------|------|--------|--------|------|
| FV Leiden         | 18%  | 35%    | 11%    | 16%  |
| FII Leiden        | 7%   | 15%    | 8%     | 5%   |
| Non O blood group | NA   | 75%    | 70%    | 78%  |
| Age of onset ≤ 50 | 100% | 81%    | 43%    | 55%  |

**Table S3. Genotype Distribution of rs169713 According to Age of VT Onset in Cases**

| rs169713 | MARTHA         |                | FARIVE         |                | MEGA           |                |
|----------|----------------|----------------|----------------|----------------|----------------|----------------|
|          | ≤ 50 years old | > 50 years old | ≤ 50 years old | > 50 years old | ≤ 50 years old | > 50 years old |
| TT       | 468 (51%)      | 107 (49%)      | 139 (58%)      | 186 (59%)      | 1274 (61%)     | 1025 (61%)     |
| TC       | 378 (41%)      | 88 (41%)       | 79 (34%)       | 109 (35%)      | 699 (34%)      | 571 (34%)      |
| CC       | 68 (8%)        | 20 (10%)       | 20 (8%)        | 19 (6%)        | 111 (5%)       | 73 (4%)        |
| MAF      | 0.281          | 0.304          | 0.249          | 0.233          | 0.221          | 0.215          |

**Table S4. Genotype Distribution of rs169713 According to FV Leiden Mutation in Cases**

| rs169713 | MARTHA             |              | FARIVE             |              | MEGA               |              |
|----------|--------------------|--------------|--------------------|--------------|--------------------|--------------|
|          | FV Leiden carriers | Non carriers | FV Leiden carriers | Non carriers | FV Leiden carriers | Non carriers |
| TT       | 205 (52%)          | 370 (50%)    | 35 (61%)           | 290 (59%)    | 384 (62%)          | 1913 (61%)   |
| TC       | 152 (39%)          | 314 (43%)    | 17 (30%)           | 171 (35%)    | 211 (34%)          | 1059 (34%)   |
| CC       | 34 (8%)            | 54 (7%)      | 5 (9%)             | 33 (6%)      | 25 (4%)            | 159 (5%)     |
| MAF      | 0.281              | 0.286        | 0.237              | 0.240        | 0.211              | 0.220        |

**Table S5. Genotype Distribution of rs169713 According to VT Status Separately in Males and Females**

| rs169713 | MARTHA    |           |           |           | FARIVE    |           |           |           |
|----------|-----------|-----------|-----------|-----------|-----------|-----------|-----------|-----------|
|          | Males     |           | Females   |           | Males     |           | Females   |           |
|          | Controls  | Cases     | Controls  | Cases     | Controls  | Cases     | Controls  | Cases     |
| TT       | 218 (57%) | 183 (54%) | 254 (61%) | 392 (50%) | 143 (60%) | 136 (62%) | 210 (64%) | 196 (58%) |
| TC       | 147 (38%) | 131 (39%) | 150 (36%) | 335 (42%) | 84 (36%)  | 69 (31%)  | 102 (31%) | 120 (35%) |
| CC       | 18 (5%)   | 23 (7%)   | 14 (3%)   | 65 (8%)   | 10 (4%)   | 15 (7%)   | 15 (5%)   | 25 (7%)   |
| MAF      | 0.239     | 0.263     | 0.213     | 0.294     | 0.219     | 0.225     | 0.202     | 0.249     |

  

| rs169713 | MEGA       |            |            |            |
|----------|------------|------------|------------|------------|
|          | Males      |            | Females    |            |
|          | Controls   | Cases      | Controls   | Cases      |
| TT       | 1389 (65%) | 1031 (61%) | 1508 (63%) | 1268 (61%) |
| TC       | 646 (30%)  | 572 (34%)  | 768 (32%)  | 698 (34%)  |
| CC       | 96 (5%)    | 77 (5%)    | 112 (5%)   | 107 (5%)   |
| MAF      | 0.197      | 0.216      | 0.208      | 0.220      |

**Table S6. Genotype Distribution of rs169713 According to VT Status Separately in Idiopathic and Non Idiopathic Patients**

| rs169713 | MARTHA    |                  |                      | FARIVE    |                  |                      | MEGA       |                  |                      |
|----------|-----------|------------------|----------------------|-----------|------------------|----------------------|------------|------------------|----------------------|
|          | Controls  | Idiopathic Cases | Non Idiopathic Cases | Controls  | Idiopathic Cases | Non Idiopathic Cases | Controls   | Idiopathic Cases | Non Idiopathic Cases |
| TT       | 472 (59%) | 168 (53%)        | 406 (50%)            | 353 (63%) | 93 (60%)         | 239 (59%)            | 2897 (64%) | 638 (61%)        | 1574 (62%)           |
| TC       | 297 (37%) | 123 (39%)        | 342 (42)             | 186 (33%) | 52 (34%)         | 137 (34%)            | 1414 (31%) | 376 (36%)        | 837 (33%)            |
| CC       | 32 (4%)   | 27 (8%)          | 60 (8%)              | 25 (4%)   | 9 (6%)           | 31 (7%)              | 208 (5%)   | 38 (3%)          | 136 (5%)             |
| MAF      | 0.225     | 0.278            | 0.286                | 0.209     | 0.227            | 0.244                | 0.202      | 0.215            | 0.217                |

**Table S7. Genotype Distribution of rs169713 According to VT Events in Cases**

| rs169713 | MARTHA    |          |          | FARIVE   |           |           | MEGA      |           |           |
|----------|-----------|----------|----------|----------|-----------|-----------|-----------|-----------|-----------|
|          | DVT       | PE       | DVT+PE   | DVT      | PE        | DVT+PE    | DVT       | PE        | DVT+PE    |
| TT       | 440 (51%) | 53 (49%) | 82 (54%) | 94 (59%) | 129 (58%) | 109 (61%) | 1385(62%) | 709 (60%) | 205 (61%) |
| TC       | 364 (42%) | 45 (42%) | 57 (38%) | 53 (33%) | 77 (34%)  | 58 (33%)  | 747 (33%) | 409(35%)  | 113 (34%) |
| CC       | 66 (7%)   | 10 (9%)  | 12 (8%)  | 13 (8%)  | 17 (8%)   | 10 (6%)   | 108 (5%)  | 58 (5%)   | 18 (5%)   |
| MAF      | 0.285     | 0.301    | 0.268    | 0.247    | 0.249     | 0.220     | 0.215     | 0.223     | 0.222     |

**Table S8. Association of SNPs at the *HIVEP1* Locus (Chromosome 6 : 12,120,710 – 12,273,217) with VT in the GWAS Scan**

| rsID             | Position        | MAF <sup>(1)</sup>   |                  | P value <sup>(2)</sup>        |
|------------------|-----------------|----------------------|------------------|-------------------------------|
|                  |                 | Controls<br>N = 1228 | Cases<br>N = 419 |                               |
| rs9368918        | 11952670        | 0.261                | 0.271            | 0.5570                        |
| rs6457906        | 11963601        | 0.087                | 0.094            | 0.4917                        |
| rs9366903        | 11966356        | 0.177                | 0.167            | 0.5144                        |
| rs932441         | 11968256        | 0.264                | 0.272            | 0.6318                        |
| rs4526189        | 11977931        | 0.360                | 0.370            | 0.5923                        |
| rs6457927        | 11978994        | 0.064                | 0.069            | 0.5637                        |
| rs2206928        | 11985018        | 0.096                | 0.107            | 0.3491                        |
| rs12211229       | 11994993        | 0.363                | 0.355            | 0.6881                        |
| rs6937349        | 12010577        | 0.072                | 0.087            | 0.1669                        |
| rs17406952       | 12016152        | 0.493                | 0.495            | 0.9157                        |
| rs876829         | 12026568        | 0.065                | 0.092            | 0.0082                        |
| rs6938400        | 12027400        | 0.251                | 0.235            | 0.3649                        |
| <b>rs169713</b>  | <b>12028503</b> | <b>0.210</b>         | <b>0.284</b>     | <b>7.24 x 10<sup>-6</sup></b> |
| rs17533974       | 12029983        | 0.059                | 0.084            | 0.0133                        |
| <b>rs209779</b>  | <b>12031151</b> | <b>0.146</b>         | <b>0.211</b>     | <b>1.04 x 10<sup>-5</sup></b> |
| <b>rs9380643</b> | <b>12038473</b> | <b>0.222</b>         | <b>0.303</b>     | <b>2.44 x 10<sup>-6</sup></b> |
| rs169715         | 12046783        | 0.050                | 0.050            | 0.9774                        |
| rs16872095       | 12053764        | 0.064                | 0.071            | 0.4993                        |
| rs1205887        | 12056122        | 0.136                | 0.183            | <b>8.62 x 10<sup>-4</sup></b> |
| rs6927024        | 12068692        | 0.200                | 0.240            | 0.0139                        |
| <b>rs6921943</b> | <b>12069956</b> | <b>0.254</b>         | <b>0.319</b>     | <b>2.66 x 10<sup>-4</sup></b> |
| rs186017         | 12071208        | 0.122                | 0.124            | 0.8487                        |
| rs7775818        | 12073684        | 0.053                | 0.078            | 0.0099                        |
| <b>rs9296224</b> | <b>12080695</b> | <b>0.080</b>         | <b>0.121</b>     | <b>4.62 x 10<sup>-4</sup></b> |
| rs1409288        | 12082826        | 0.265                | 0.283            | 0.3109                        |
| rs4711507        | 12090447        | 0.213                | 0.206            | 0.6490                        |
| rs9380700        | 12099225        | 0.229                | 0.216            | 0.4434                        |
| rs6925772        | 12128227        | 0.192                | 0.206            | 0.3599                        |
| <b>rs2327506</b> | <b>12137410</b> | <b>0.418</b>         | <b>0.499</b>     | <b>5.48 x 10<sup>-5</sup></b> |
| rs9296237        | 12141237        | 0.049                | 0.074            | 0.0058                        |
| rs12234132       | 12150191        | 0.136                | 0.179            | 0.0020                        |
| rs1570989        | 12156813        | 0.217                | 0.226            | 0.6117                        |
| rs7749026        | 12172004        | 0.407                | 0.408            | 0.9609                        |
| rs4714170        | 12177683        | 0.249                | 0.269            | 0.2428                        |
| rs6916070        | 12179270        | 0.291                | 0.255            | 0.0411                        |
| rs2327508        | 12186698        | 0.399                | 0.420            | 0.3023                        |
| rs2327509        | 12186758        | 0.231                | 0.222            | 0.5644                        |
| rs9380764        | 12190200        | 0.060                | 0.081            | 0.0290                        |
| rs9380781        | 12207264        | 0.361                | 0.358            | 0.8717                        |
| rs7768491        | 12210601        | 0.107                | 0.138            | 0.0187                        |
| rs12213481       | 12219855        | 0.066                | 0.064            | 0.8802                        |
| rs4377779        | 12225330        | 0.355                | 0.356            | 0.9671                        |
| rs2228210        | 12230160        | 0.360                | 0.358            | 0.9045                        |
| rs2228220        | 12231235        | 0.111                | 0.142            | 0.0174                        |
| rs2228213        | 12232841        | 0.353                | 0.356            | 0.9103                        |
| rs1126472        | 12233758        | 0.123                | 0.160            | 0.0063                        |
| rs3777772        | 12243420        | 0.176                | 0.162            | 0.3601                        |
| rs2157494        | 12263635        | 0.248                | 0.252            | 0.8082                        |

SNP associated with VT at  $p < 10^{-3}$  are shown in bold.

<sup>(1)</sup> Minor Allele Frequency

<sup>(2)</sup> P values of the Cochran-Armitage trend test

**Figure S1. RT-PCR Amplification of *HIVEP1* in Huvecs (A), Platelets (B) and Monocytes/Macrophages (C)**

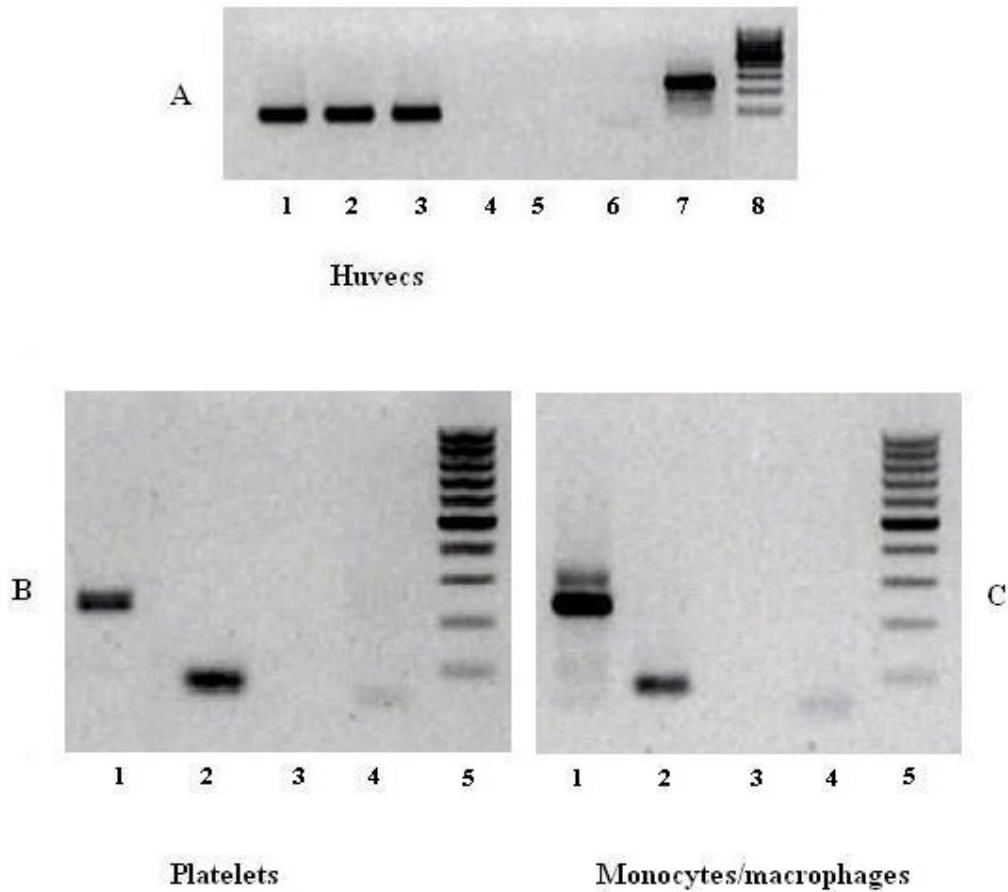

A: Huvecs and leucocytes: lines 1-3: Huvec RT+; lines 4- 6: Huvecs RT-; line 7: genomic DNA, line 8: 100 bp DNA ladder

B: Platelets: line 1: genomic DNA, 2: RT+, 3: RT-, 4: H<sub>2</sub>O, 5: 100pb DNA ladder

C: monocytes/macrophages: line 1: genomic DNA, 2: RT+, 3: RT-, 4: H<sub>2</sub>O, 5: 100pb DNA ladder

Detailed experimental conditions for platelets and monocytes isolation, RNA extraction and RT-PCR can be obtained upon request.

**Figure S2. RT-PCR Amplification (Left) and mRNA Expression (Right) of *HIVEP1* in Human Atherosclerotic Lesions**

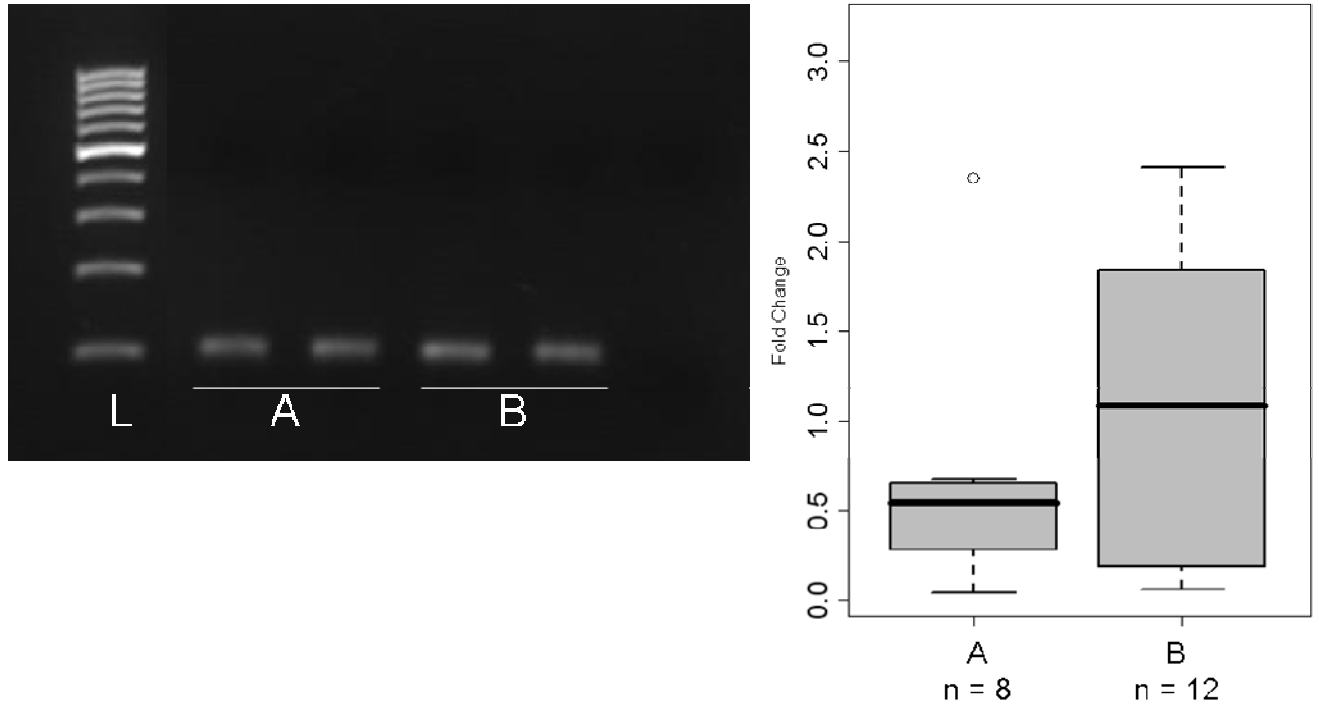

L: 100pb DNA ladder  
A: fatty streaks  
B: plaques

Fragments of human atherosclerotic lesions from full-thickness resections of carotids were obtained from the Department of Vascular Surgery (Pitié-Salpêtrière Hospital, Paris). Twenty fresh samples were dissected less than 3 hours after excision and divided into fatty streaks and plaques, and immediately extracted with Trizol (Invitrogen SARL, Cergy, France) for total RNA. RNA was purified with the RNeasy Kit (Qiagen GmbH, Hilden, Germany) and RNA preparations were subjected to Agilent Bioanalyser (Agilent, Massy, France). Only RNA with RIN >8 were amplified and used for RT-PCR.
